# Supplementary material for: Novel Biodegradable Starch Film for Food Packaging with Antimicrobial Chicory Root Extract and Phytic Acid as a Cross-Linking Agent
Source: PubMed Central journal article supplement (PMC7699324; doi:10.3390/foods9111696), 2020-11-19
Supplement: foods-09-01696-s001.pdf [file foods-09-01696-s001.pdf]

## Supplementary materials

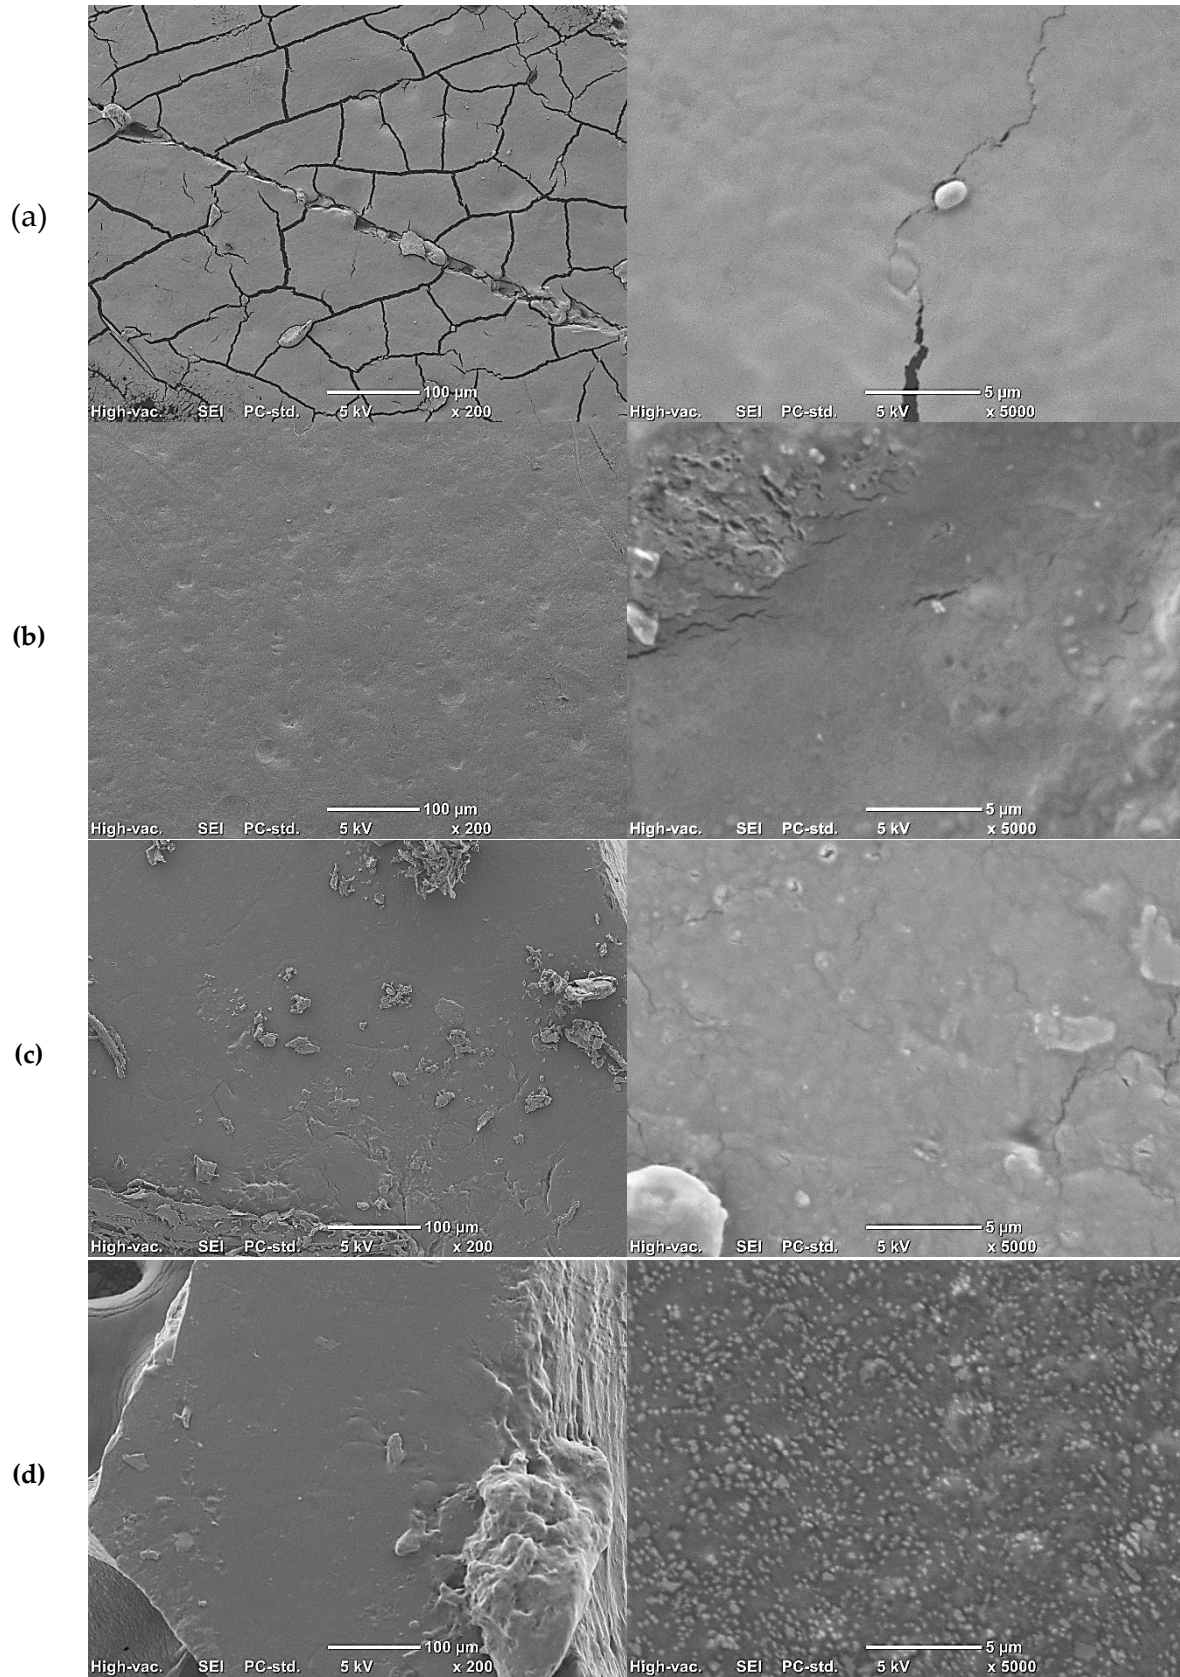

(e)

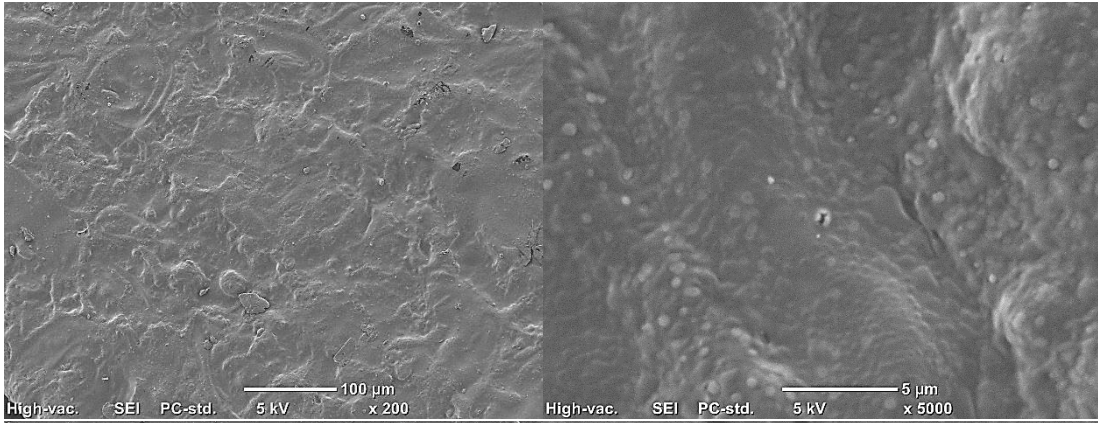

(f)

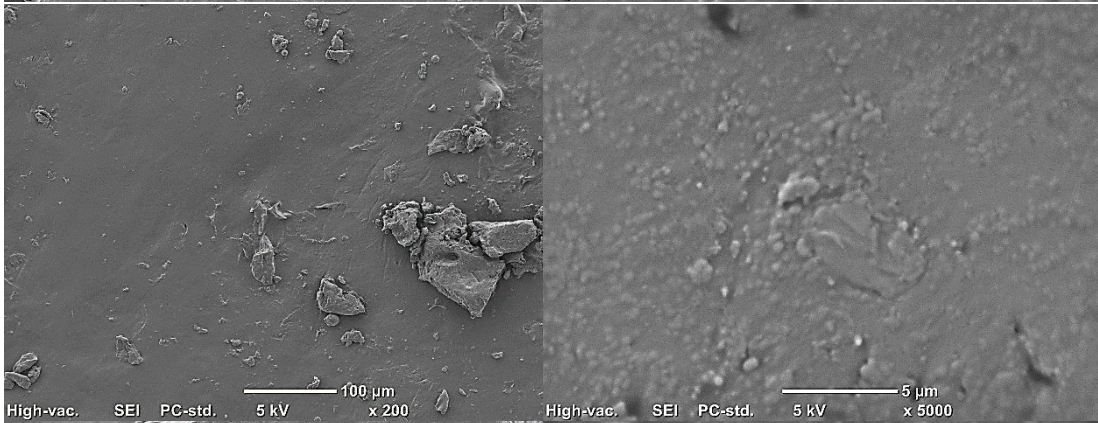

(g)

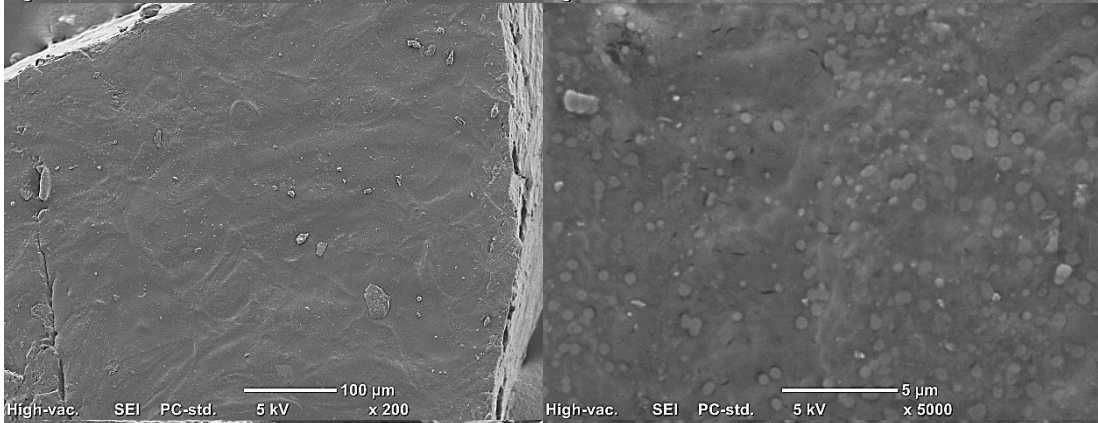

(h)

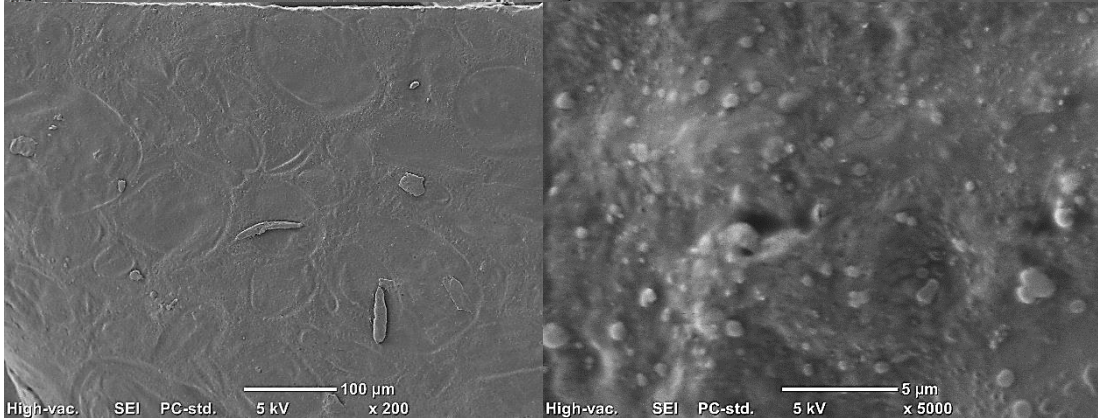

(i)

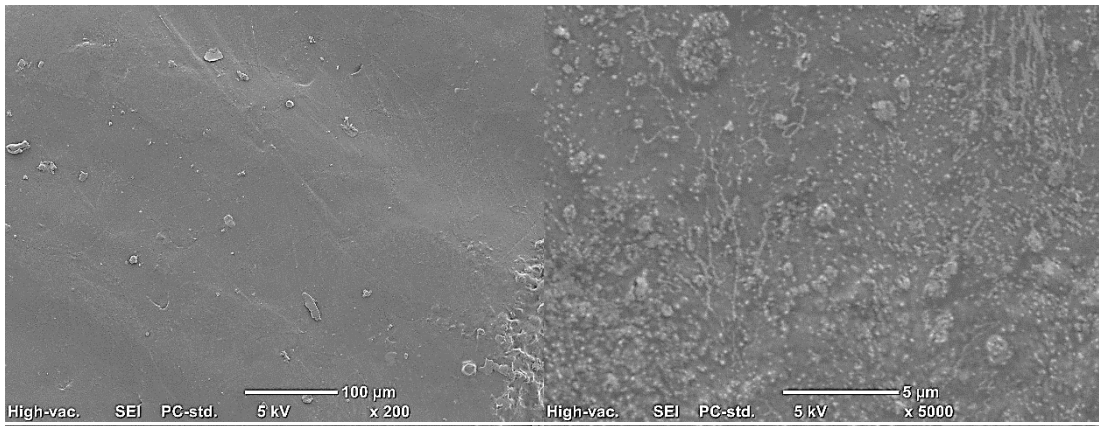

(j)

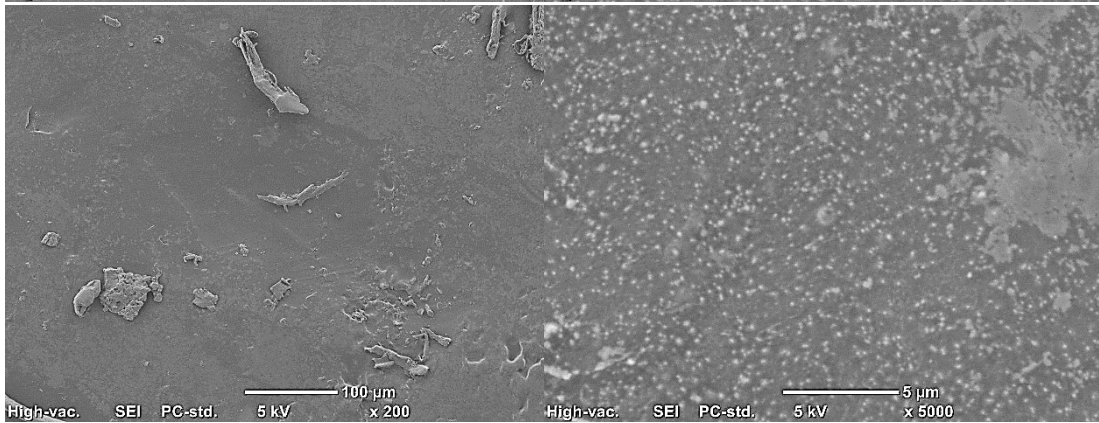

(k)

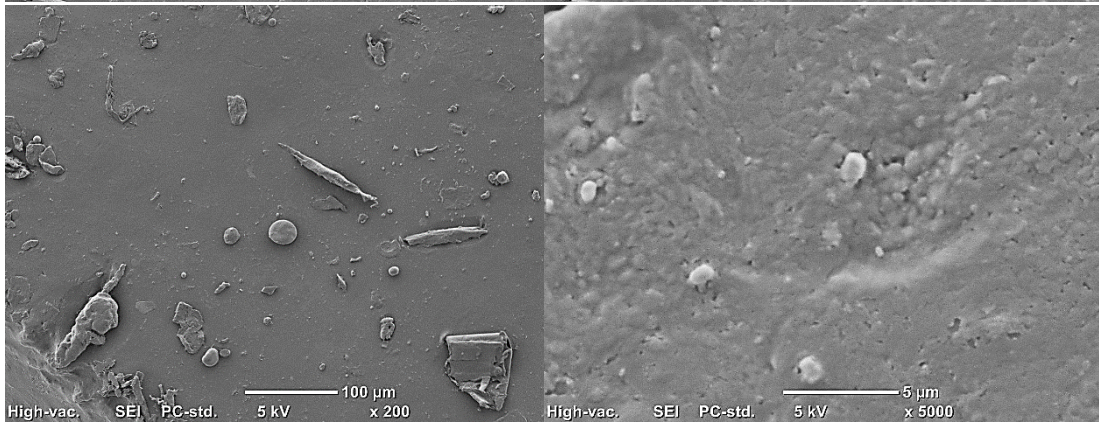

(l)

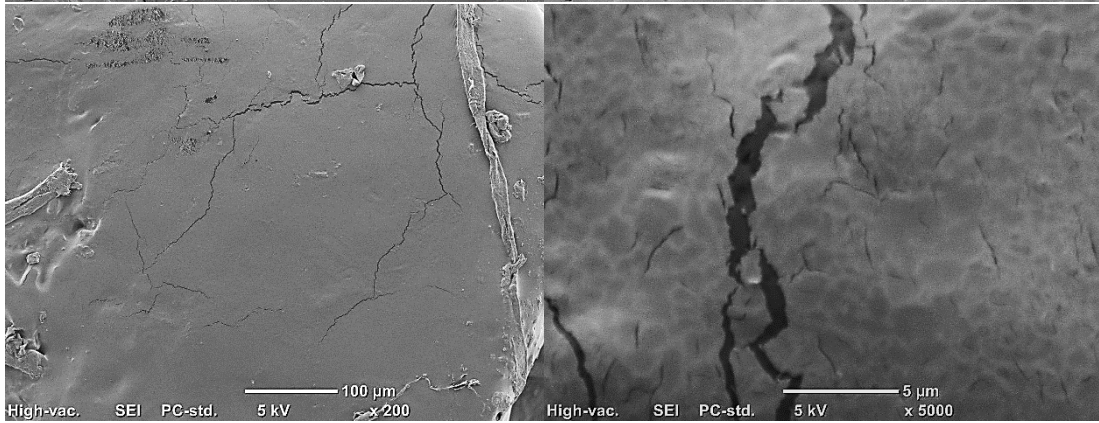

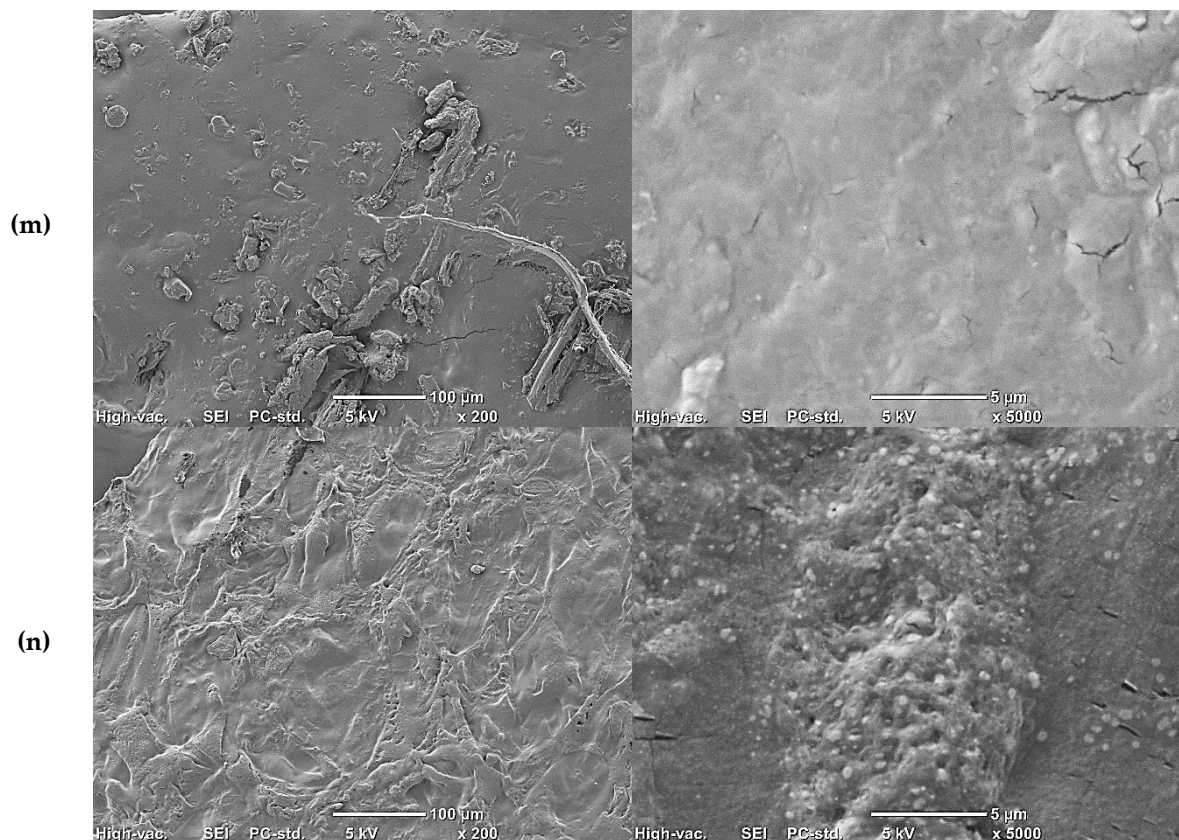

**Figure S1.** Representative images showing the structure of foil using a scanning electron microscope (SEM): (a) control; (b) with phytic acid; (c) with phytic acid + chicory root water extract 1%; (d) with phytic acid + chicory root water extract 2%; (e) with phytic acid + chicory root water extract 5%; (f) with phytic acid + chicory root water-methanol 70:30 extract 1%; (g) with phytic acid + chicory root water-methanol 70:30 extract 2%; (h) with phytic acid + chicory root water-methanol 70:30 extract 5%; (i) with phytic acid + chicory root water-methanol 50:50 extract 1%; (j) with phytic acid + chicory root water-methanol 50:50 extract 2%; (k) with phytic acid + chicory root water-methanol 50:50 extract 5%; (l) with phytic acid + chicory root water-phytase extract 1%; (m) with phytic acid + chicory root water-phytase extract 2%; (n) with phytic acid + chicory root water-phytase extract 5%.

**Table S1.** Thickness spread for one film measured at 5 locations

| Concentration of the extract | Place | Film <sup>1</sup> |          |          |     |
|------------------------------|-------|-------------------|----------|----------|-----|
|                              |       | FW                | FWM70/30 | FWM50/50 | FWE |
|                              |       | Thickness (mm)    |          |          |     |
| Control                      | 1     | 0.108             |          |          |     |
|                              | 2     | 0.130             |          |          |     |
|                              | 3     | 0.075             |          |          |     |
|                              | 4     | 0.089             |          |          |     |
|                              | 5     | 0.126             |          |          |     |
|                              | mean  | 0.106             |          |          |     |
|                              | SD    | 0.021             |          |          |     |
| 0%                           | 1     | 0.121             |          |          |     |
|                              | 2     | 0.147             |          |          |     |
|                              | 3     | 0.142             |          |          |     |
|                              | 4     | 0.149             |          |          |     |
|                              | 5     | 0.176             |          |          |     |
|                              | mean  | 0.147             |          |          |     |
|                              | SD    | 0.018             |          |          |     |

|    |      |       |       |       |       |
|----|------|-------|-------|-------|-------|
| 1% | 1    | 0.158 | 0.146 | 0.139 | 0.176 |
|    | 2    | 0.152 | 0.141 | 0.127 | 0.178 |
|    | 3    | 0.155 | 0.127 | 0.131 | 0.129 |
|    | 4    | 0.150 | 0.118 | 0.129 | 0.174 |
|    | 5    | 0.133 | 0.151 | 0.148 | 0.169 |
|    | mean | 0.150 | 0.137 | 0.135 | 0.166 |
|    | SD   | 0.009 | 0.012 | 0.008 | 0.018 |
| 2% | 1    | 0.183 | 0.168 | 0.14  | 0.171 |
|    | 2    | 0.148 | 0.167 | 0.179 | 0.189 |
|    | 3    | 0.157 | 0.152 | 0.132 | 0.176 |
|    | 4    | 0.183 | 0.137 | 0.135 | 0.166 |
|    | 5    | 0.182 | 0.167 | 0.122 | 0.130 |
|    | mean | 0.171 | 0.158 | 0.142 | 0.167 |
|    | SD   | 0.015 | 0.011 | 0.020 | 0.020 |
| 5% | 1    | 0.242 | 0.198 | 0.162 | 0.221 |
|    | 2    | 0.201 | 0.225 | 0.178 | 0.249 |
|    | 3    | 0.221 | 0.228 | 0.148 | 0.201 |
|    | 4    | 0.212 | 0.189 | 0.162 | 0.173 |
|    | 5    | 0.187 | 0.181 | 0.148 | 0.199 |
|    | mean | 0.213 | 0.200 | 0.160 | 0.209 |
|    | SD   | 0.019 | 0.017 | 0.011 | 0.025 |

<sup>1</sup>FW - film with water extract; FWM70/30 film with water-methanol (70/30, *v/v*) extract; FWM50/50 - film with water-methanol (50/50, *v/v*) extract; FWE – film with water-enzyme extract; control - without phytic acid and chicory root extract.
